# Supplementary material
Source: publisher figshare collection journal article supplement (https://gsapubs.figshare.com/ndownloader/files/23303297)
Supplement: Supplementary file 1 [file 23303297]

Supplemental Material

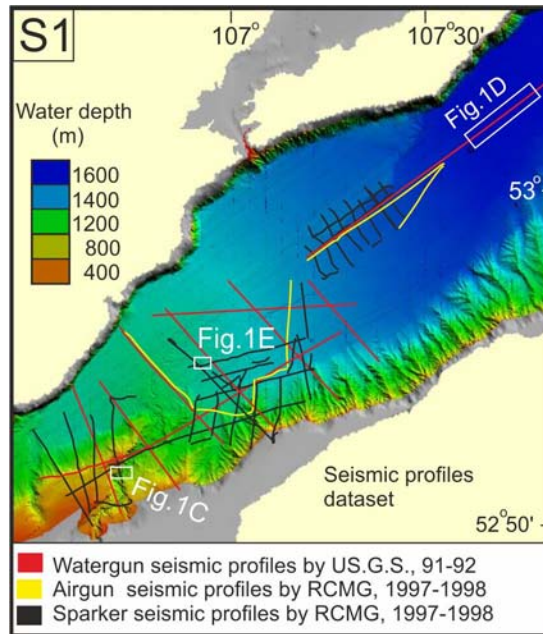

Figure DR1: Seismic profile dataset and location of figures with selected seismic profiles.

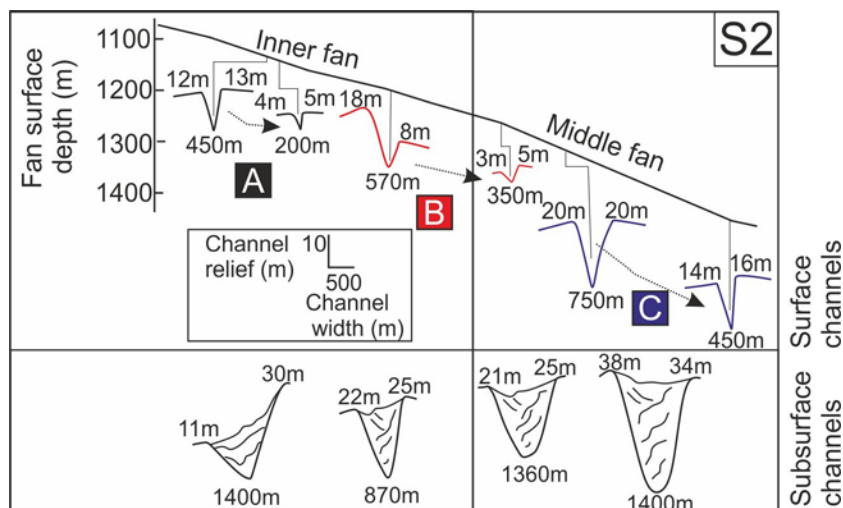

Figure DR2: Surface (upper panel) and subsurface (lower panel) inner and middle fan channel morphology. Arrows connect each color coded channel proximal to distal changes in morphology. Channel outline colors keyed to Fig. 1B. Note that thicknesses of subsurface channels are not corrected for compaction.
